# Supplementary material
Source: Springer Nature journal article supplement (https://www.springermedizin.de/resource/supplementary/13012_2013_664_MOESM3_ESM.pdf/9630478)

Use ——— Non-Use - - -

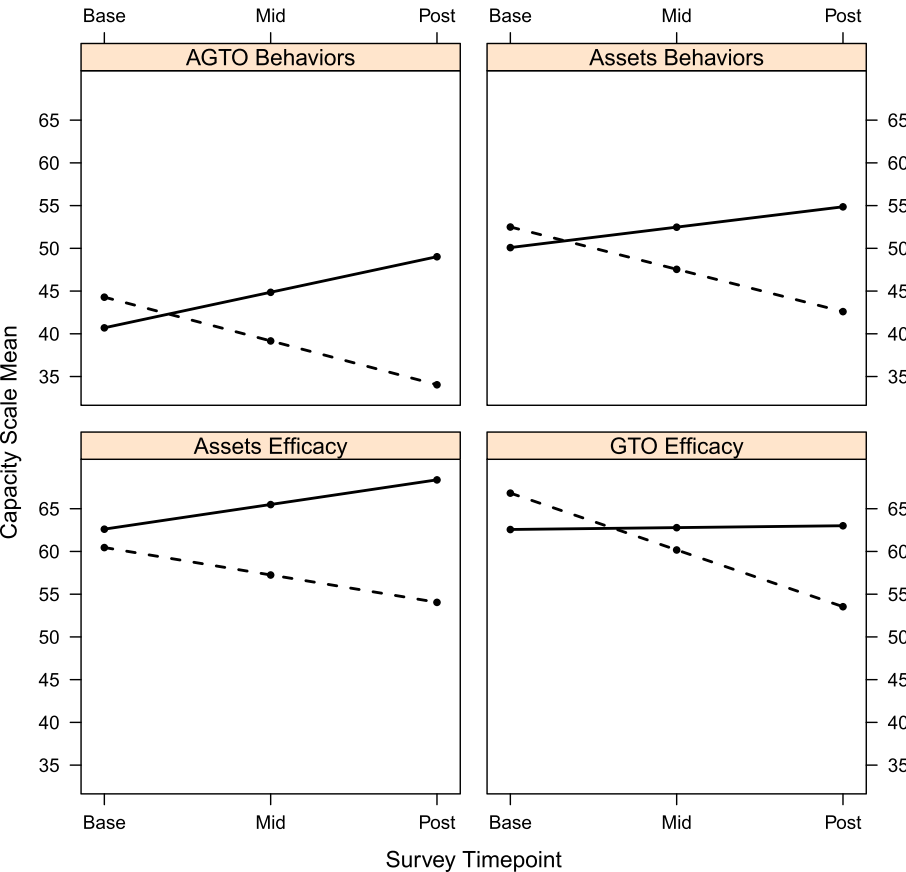

Supplement: MOESM3 [file 9630478]
